# Supplementary material for: Modernising tactile acuity assessment; clinimetrics of semi-automated tests and effects of age, sex and anthropometry on performance
Source: PeerJ. 2021 Oct 25;9:e12192. doi: 10.7717/peerj.12192 (PMC8759376; doi:10.7717/peerj.12192)
Supplement: Supplemental Information 7 [file peerj-09-12192-s007.xlsx]

## Sheet: Data experiment 1
RandOrder	Participant	Age	Gender	LocT1AS	LocT2AS	LocT3AS	LocT1avRT	LocT2avRT	LocT3avRT	LocT1RCS	LocT2RCS	LocT3RCS	OriT1AS	OriT2AS	OriT3AS	OriT1avRT	OriT2avRT	OriT3avRT	OriT1RCS	OriT2RCS	OriT3RCS	OverallT1AS	OverallT2AS	OverallT3AS	OverallT1avRT	OverallT2avRT	OverallT3avRT	OverallT1RCS	OverallT2RCS	OverallT3RCS	TpdtT1THAv	TpdtT2THAv	TpdtT3THAv	LocASAv	LocAvRTAv	LocRCSAv	OriASAv	OriAvRTAv	OriRCSAv	OverallASAv	OverallAvRTAv	OverallRCSAv	TpdtAvTHAv
0	1	24	1	64	54	51	927	1047	1047	41.4239	30.9456	29.2264	48	41	52	1600	1813	1593	18	13.5687	19.5857	56	47.5	51.5	1263.5	1430	1320	26.5928	19.9301	23.4091	31	34.575	21	56.3333	1007	33.8653	47	1668.67	17.0515	51.6667	1337.83	23.3107	28.8583
0	2	23	1	88	93	82	1309	1208	1029	40.3361	46.1921	47.8134	69	59	62	2575	2190	1948	16.0777	16.1644	19.0965	78.5	76	72	1942	1699	1488.5	24.2533	26.8393	29.0225	33.75	10	22.15	87.6667	1182	44.7805	63.3333	2237.67	17.1129	75.5	1709.83	26.7051	21.9667
1	3	23	1	50	68	58	1563	1405	1385	19.1939	29.0391	25.1264	22	31	34	1839	2111	2267	7.17781	8.81099	8.99868	36	49.5	46	1701	1758	1826	12.6984	16.8942	15.115	8.6	27	48.025	58.6667	1451	24.4531	29	2072.33	8.32916	43.8333	1761.67	14.9025	27.875
0	4	47	0	62	61	64	1510	1856	1783	24.6358	19.7198	21.5367	45	52	45	2464	2565	2652	10.9578	12.1637	10.181	53.5	56.5	54.5	1987	2210.5	2217.5	16.155	15.3359	14.7463	88.1	103.5	68.475	62.3333	1716.33	21.9641	47.3333	2560.33	11.1008	54.8333	2138.33	15.4124	86.6917
0	5	21	0	64	50	40	1004	956	910	38.247	31.3808	26.3736	44	64	48	1767	1673	1603	14.9406	22.9528	17.9663	54	57	44	1385.5	1314.5	1256.5	23.3851	26.0175	21.0107	75.075	81	120.925	51.3333	956.667	32.0005	52	1681	18.6199	51.6667	1318.83	23.4711	92.3333
1	6	21	0	58	57	58	884	957	926	39.3665	35.7367	37.581	55	52	41	1898	1681	1743	17.3867	18.5604	14.1136	56.5	54.5	49.5	1391	1319	1334.5	24.371	24.7915	22.2555	21.65	29.5	62.6	57.6667	922.333	37.5614	49.3333	1774	16.6869	53.5	1348.17	23.806	37.9167
1	7	21	0	39	60	49	1115	1238	989	20.9865	29.0792	29.727	48	45	47	1877	1751	1738	15.3436	15.4198	16.2255	43.5	52.5	48	1496	1494.5	1363.5	17.4465	21.0773	21.1221	41.55	38.5	46.55	49.3333	1114	26.5976	46.6667	1788.67	15.663	48	1451.33	19.882	42.2
1	8	21	1	60	54	79	1504	1616	1395	23.9362	20.0495	33.9785	47	44	42	2306	2251	2154	12.229	11.7281	11.6992	53.5	49	60.5	1905	1933.5	1774.5	16.8504	15.2056	20.4565	50.225	41.5	38.5	64.3333	1505	25.9881	44.3333	2237	11.8854	54.3333	1871	17.5041	43.4083
0	9	23	1	47	40	43	1258	1293	1206	22.4165	18.5615	21.393	42	38	34	2161	1908	2020	11.6613	11.9497	10.099	44.5	39	38.5	1709.5	1600.5	1613	15.6186	14.6204	14.3211	41.6	52.5	61	43.3333	1252.33	20.7904	38	2029.67	11.2367	40.6667	1641	14.8534	51.7
1	10	22	1	86	79	81	997	1109	1097	51.7553	42.7412	44.3026	56	55	52	1842	1812	1972	18.241	18.2119	15.8215	71	67	66.5	1419.5	1460.5	1534.5	30.0106	27.5248	26.002	26.7	14.5	35.425	82	1067.67	46.2664	54.3333	1875.33	17.4248	68.1667	1471.5	27.8458	25.5417
1	11	25	1	49	58	62	1560	1574	1383	18.8462	22.1093	26.898	44	52	50	1838	1993	1886	14.3634	15.6548	15.9067	46.5	55	56	1699	1783.5	1634.5	16.4214	18.5029	20.5567	75.1	56.55	68	56.3333	1505.67	22.6178	48.6667	1905.67	15.3083	52.5	1705.67	18.4937	66.55
1	12	25	1	75	72	67	1704	1353	1327	26.4085	31.929	30.2939	53	52	53	2189	2133	2120	14.5272	14.6273	15	64	62	60	1946.5	1743	1723.5	19.7277	21.3425	20.8877	45.625	55	58.125	71.3333	1461.33	29.5438	52.6667	2147.33	14.7182	62	1804.33	20.6527	52.9167
0	13	25	1	57	44	50	1903	1938	1758	17.9716	13.6223	17.0648	41	48	45	2584	2874	2227	9.52012	10.0209	12.1239	49	46	47.5	2243.5	2406	1992.5	13.1045	11.4713	14.3036	54.55	57.5	51	50.3333	1866.33	16.2196	44.6667	2561.67	10.555	47.5	2214	12.9598	54.35
1	14	23	1	92	92	89	1319	1161	1103	41.8499	47.5452	48.4134	69	67	53	2066	2011	1784	20.0387	19.9901	17.8251	80.5	79.5	71	1692.5	1586	1443.5	28.5377	30.0757	29.5116	22.5	39.425	18.5	91	1194.33	45.9362	63	1953.67	19.2846	77	1574	29.375	26.8083
1	15	26	1	54	47	49	840	965	957	38.5714	29.2228	30.721	45	53	47	1649	1875	1910	16.3736	16.96	14.7644	49.5	50	48	1244.5	1420	1433.5	23.865	21.1268	20.0907	36	44.85	32.025	50	920.667	32.8384	48.3333	1811.33	16.0327	49.1667	1366	21.6942	37.625
1	16	23	1	72	75	74	1404	1221	1112	30.7692	36.855	39.9281	55	53	59	1648	1672	1609	20.0243	19.0191	22.0012	63.5	64	66.5	1526	1446.5	1360.5	24.9672	26.5468	29.3275	33	44.575	37.175	73.6667	1245.67	35.8508	55.6667	1643	20.3482	64.6667	1444.33	26.9472	38.25
0	17	22	0	61	65	62	1202	916	853	30.4493	42.5764	43.6108	56	52	36	1859	1735	1716	18.0742	17.9827	12.5874	58.5	58.5	49	1530.5	1325.5	1284.5	22.9337	26.4806	22.8883	11.5	9.575	9.3	62.6667	990.333	38.8788	48	1770	16.2148	55.3333	1380.17	24.1008	10.125
0	18	26	0	61	64	58	1528	1255	1098	23.9529	30.5976	31.694	28	41	44	1841	1875	1890	9.12548	13.12	13.9683	44.5	52.5	51	1684.5	1565	1494	15.8504	20.1278	20.4819	48.5	46.1	54.775	61	1293.67	28.7482	37.6667	1868.67	12.0712	49.3333	1581.17	18.82	49.7917
0	19	24	1	68	36	60	1110	1025	905	36.7568	21.0732	39.779	45	34	34	1856	1884	1805	14.5474	10.828	11.3019	56.5	35	47	1483	1454.5	1355	22.8591	14.438	20.8118	28.5	42.95	36.15	54.6667	1013.33	32.5363	37.6667	1848.33	12.2258	46.1667	1430.83	19.3696	35.8667
1	20	22	1	67	78	81	1619	1530	1539	24.8301	30.5882	31.5789	48	38	41	2414	2436	2453	11.9304	9.35961	10.0285	57.5	58	61	2016.5	1983	1996	17.1089	17.5492	18.3367	51	59.1	49.575	75.3333	1562.67	28.9991	42.3333	2434.33	10.4395	58.8333	1998.5	17.6649	53.225
1	21	28	1	79	56	51	1233	1237	1236	38.4428	27.1625	24.7573	55	61	61	1965	2232	1968	16.7939	16.3978	18.5976	67	58.5	56	1599	1734.5	1602	25.1407	20.2364	20.9738	42.5	50.025	72.2	62	1235.33	30.1209	59	2055	17.2631	60.5	1645.17	22.117	54.9083
0	22	21	0	53	54	36	1018	841	912	31.2377	38.5256	23.6842	28	39	25	1624	1626	1644	10.3448	14.3911	9.12409	40.5	46.5	30.5	1321	1233.5	1278	18.3952	22.6186	14.3192	78.5	90.6	94.425	47.6667	923.667	31.1492	30.6667	1631.33	11.2867	39.1667	1277.5	18.4443	87.8417
1	23	21	0	54	51	40	1563	1451	1374	20.7294	21.0889	17.4672	53	52	47	1999	1967	1928	15.908	15.8617	14.6266	53.5	51.5	43.5	1781	1709	1651	18.0236	18.0807	15.8086	49.5	47.05	49.725	48.3333	1462.67	19.7618	50.6667	1964.67	15.4654	49.5	1713.67	17.3043	48.7583
0	24	24	1	78	51	64	1234	1325	1355	37.9254	23.0943	28.3395	62	61	47	2626	2687	2682	14.166	13.6211	10.5145	70	56	55.5	1930	2006	2018.5	21.7617	16.7498	16.4974	56	68.9	75.6	64.3333	1304.67	29.7864	56.6667	2665	12.7672	60.5	1984.83	18.3363	66.8333
0	25	24	1	64	58	60	1207	1000	870	31.8144	34.8	41.3793	47	48	45	1946	1900	1735	14.4913	15.1579	15.562	55.5	53	52.5	1576.5	1450	1302.5	21.1227	21.931	24.1843	40.5	30.525	66.375	60.6667	1025.67	35.9979	46.6667	1860.33	15.0704	53.6667	1443	22.4127	45.8
0	26	24	0	54	38	54	1096	987	909	29.562	23.1003	35.6436	44	33	42	2143	2164	1974	12.3192	9.14972	12.766	49	35.5	48	1619.5	1575.5	1441.5	18.1538	13.5195	19.9792	49	57.575	53.5	48.6667	997.333	29.4353	39.6667	2093.67	11.4116	44.1667	1545.5	17.2175	53.3583
0	27	23	1	47	47	68	968	988	1238	29.1322	28.5425	32.9564	55	59	66	1966	2086	1886	16.7854	16.9703	20.9968	51	53	67	1467	1537	1562	20.8589	20.6897	25.7362	34.725	37	34.5	54	1064.67	30.2104	60	1979.33	18.2508	57	1522	22.4283	35.4083
1	28	25	1	68	62	61	1336	1382	1378	30.5389	26.9175	26.5602	56	38	53	2205	1896	2179	15.2381	12.0253	14.5939	62	50	57	1770.5	1639	1778.5	21.011	18.3038	19.2297	81.15	95	34.525	63.6667	1365.33	28.0056	49	2093.33	13.9524	56.3333	1729.33	19.5148	70.225
1	29	21	0	44	46	25	1255	1210	1129	21.0359	22.8099	13.2861	38	38	20	1896	1646	1608	12.0253	13.8518	7.46269	41	42	22.5	1575.5	1428	1368.5	15.6141	17.6471	9.86482	21	33.575	16	38.3333	1198	19.044	32	1716.67	11.1133	35.1667	1457.33	14.3753	23.525
0	30	25	1	78	65	71	1553	1459	1453	30.1352	26.7306	29.3187	59	59	66	2391	2376	2236	14.8055	14.899	17.7102	68.5	62	68.5	1972	1917.5	1844.5	20.8418	19.4003	22.2825	17.5	30.575	43.5	71.3333	1488.33	28.7282	61.3333	2334.33	15.8049	66.3333	1911.33	20.8415	30.525
0	31	24	1	61	60	54	1059	1008	998	34.5609	35.7143	32.4649	20	25	17	1678	1675	1510	7.15137	8.95522	6.75497	40.5	42.5	35.5	1368.5	1341.5	1254	17.7567	19.0086	16.9856	58.675	48.1	54.5	58.3333	1021.67	34.2467	20.6667	1621	7.62052	39.5	1321.33	17.917	53.7583
1	32	23	1	76	68	61	1202	1115	1168	37.9368	36.5919	31.3356	56	55	53	2023	2001	1826	16.609	16.4918	17.4151	66	61.5	57	1612.5	1558	1497	24.5581	23.6842	22.8457	89.05	70.1	54.5	68.3333	1161.67	35.2881	54.6667	1950	16.8386	61.5	1555.83	23.696	71.2167
0	33	34	1	88	83	85	1383	1421	1433	38.1779	35.0457	35.5897	59	52	56	2331	2086	2584	15.1866	14.9569	13.0031	73.5	67.5	70.5	1857	1753.5	2008.5	23.748	23.0967	21.0605	76.725	73.925	60.5	85.3333	1412.33	36.2711	55.6667	2333.67	14.3822	70.5	1873	22.635	70.3833
0	34	22	0	94	65	68	1593	1677	1833	35.4049	23.2558	22.2586	66	55	44	2598	2685	2326	15.2425	12.2905	11.35	80	60	56	2095.5	2181	2079.5	22.9062	16.5062	16.1577	35.825	40.25	69.5	75.6667	1701	26.9731	55	2536.33	12.961	65.3333	2118.67	18.5234	48.525
1	35	23	0	83	69	65	962	956	873	51.7672	43.3054	44.6735	27	25	30	1840	1825	1468	8.80435	8.21918	12.2616	55	47	47.5	1401	1390.5	1170.5	23.5546	20.2805	24.3486	29.025	35.6	56	72.3333	930.333	46.582	27.3333	1711	9.7617	49.8333	1320.67	22.7279	40.2083
0	36	23	0	64	54	51	1096	1152	1094	35.0365	28.125	27.9707	42	47	48	1859	1827	1846	13.5557	15.4351	15.6013	53	50.5	49.5	1477.5	1489.5	1470	21.5228	20.3424	20.2041	27.025	35.5	35.125	56.3333	1114	30.3774	45.6667	1844	14.864	51	1479	20.6898	32.55
1	37	22	0	43	61	62	1288	1333	1329	20.0311	27.4569	27.991	38	50	53	1825	1759	1840	12.4932	17.0551	17.2826	40.5	55.5	57.5	1556.5	1546	1584.5	15.6119	21.5395	21.7734	35.425	35	46.025	55.3333	1316.67	25.1596	47	1808	15.6103	51.1667	1562.33	19.6416	38.8167
1	38	21	0	75	43	69	1353	1283	1200	33.2594	20.1091	34.5	44	52	50	1927	1778	1948	13.7001	17.5478	15.4004	59.5	47.5	59.5	1640	1530.5	1574	21.7683	18.6214	22.6811	21.025	15.5	19.525	62.3333	1278.67	29.2895	48.6667	1884.33	15.5494	55.5	1581.5	21.0236	18.6833
1	39	27	1	35	43	46	1424	1097	1257	14.7472	23.5187	21.957	16	20	19	2097	2115	1898	4.57797	5.67376	6.00632	25.5	31.5	32.5	1760.5	1606	1577.5	8.69071	11.7684	12.3613	74	76.175	67.5	41.3333	1259.33	20.0743	18.3333	2036.67	5.41935	29.8333	1648	10.9401	72.5583
0	40	20	1	51	44	38	1033	1242	879	29.6225	21.256	25.9386	44	38	41	1811	1975	1697	14.5776	11.5443	14.4962	47.5	41	39.5	1422	1608.5	1288	20.0422	15.2938	18.4006	65.575	65.225	48.5	44.3333	1051.33	25.6057	41	1827.67	13.5394	42.6667	1439.5	17.9122	59.7667

## Sheet: labels
RandOrder	Test performed first	0=TPDT first, 1=iTAD first
Participant	Participant number
Age	Age in years
Gender	Gender	0=female, 1=male
LocT1AS	Localisation Trial 1 accuracy score (%)
LocT2AS	Localisation Trial 2 accuracy score (%)
LocT3AS	Localisation Trial 3 accuracy score (%)
LocT1avRT	Localisation Trial 1 average response time (ms)
LocT2avRT	Localisation Trial 2 average response time (ms)
LocT3avRT	Localisation Trial 3 average response time (ms)
LocT1RCS	Localisation Trial 1 Rate correct score (# correct responses / min)
LocT2RCS	Localisation Trial 2 Rate correct score (# correct responses / min)
LocT3RCS	Localisation Trial 3 Rate correct score (# correct responses / min)
OriT1AS	Orientation Trial 1 accuracy score (%)
OriT2AS	Orientation Trial 2 accuracy score (%)
OriT3AS	Orientation Trial 3 accuracy score (%)
OriT1avRT	Orientation Trial 1 average response time (ms)
OriT2avRT	Orientation Trial 2 average response time (ms)
OriT3avRT	Orientation Trial 3 average response time (ms)
OriT1RCS	Orientation Trial 1 Rate correct score (# correct responses / min)
OriT2RCS	Orientation Trial 2 Rate correct score (# correct responses / min)
OriT3RCS	Orientation Trial 3 Rate correct score (# correct responses / min)
OverallT1AS	Overall Score Trial 1 accuracy score (%)
OverallT2AS	Overall Score Trial 2 accuracy score (%)
OverallT3AS	Overall Score Trial 3 accuracy score (%)
OverallT1avRT	Overall Score Trial 1 average response time (ms)
OverallT2avRT	Overall Score Trial 2 average response time (ms)
OverallT3avRT	Overall Score Trial 3 average response time (ms)
OverallT1RCS	Overall score Trial 1 Rate correct score (# correct responses / min)
OverallT2RCS	Overall score Trial 2 Rate correct score (# correct responses / min)
OverallT3RCS	Overall score Trial 3 Rate correct score (# correct responses / min)
TpdtT1THAv	TPDT Trial 1 thershold average (mm)
TpdtT2THAv	TPDT Trial 2 thershold average (mm)
TpdtT3THAv	TPDT Trial 3 thershold average (mm)
LocASAv	Localisation average trial 1-3 accuracy score (%)
LocAvRTAv	Localisation average trial 1-3 average response time (ms)
LocRCSAv	Localisation average trial 1-3 Rate correct score (# correct responses / min)
OriASAv	Orientation average trial 1-3 total score (%)
OriAvRTAv	Orientation average trial 1-3 response time (ms)
OriRCSAv	Orientation average trial 1-3 Rate correct score (# correct responses / min)
OverallASAv	Overall score average trial 1-3 total score (%)
OverallAvRTAv	Overall score average trial 1-3 response time (ms)
OverallRCSAv	Overall score average trial 1-3 Rate correct score (# correct responses / min)
TpdtAvTHAv	TPDT average trial 1-3 threshold average (mm)
