# Supplementary material for: Modernising tactile acuity assessment; clinimetrics of semi-automated tests and effects of age, sex and anthropometry on performance
Source: PeerJ. 2021 Oct 25;9:e12192. doi: 10.7717/peerj.12192 (PMC8759376; doi:10.7717/peerj.12192)
Supplement: Supplemental Information 9 [file peerj-09-12192-s009.xlsx]

## Sheet: Data experiment 2
Participant	gender	Age	AgeBracketDec	Height	Weight	BMI	NeckHeight	NeckCirc	NSA	LocDuration	LocAS	LocRT	LocRCS	LocBlock1	LocBlock2	LocBlock3	LocBlock4	LocBlock5	LocBlock6	OriDuration	OriAS	OriRT	OriRCS	OriBlock1	OriBlock2	OriBlock3	OriBlock4	OverallAS	OverallRT	OverallRCS
1	0	24	1	160	56	21.875	13	32.5	211.25	00:03:11	32	1655	11.6012	67	33	0	17	42	33	00:03:16	25	1956	7.66871	19	25	31	25	28.5	1805.5	9.47106
2	0	21	1	175	63	20.5714	15	31.5	236.25	00:02:32	43	1064	24.2481	33	17	67	75	17	50	00:03:18	39	2016	11.6071	44	31	31	50	41	1540	15.974
3	0	19	1	174	65	21.4692	13.5	33.5	226.125	00:02:59	58	1488	23.3871	42	67	67	50	58	67	00:03:06	55	1818	18.1518	62	69	31	56	56.5	1653	20.5082
4	0	21	1	160	47	18.3594	13	31	201.5	00:02:59	38	1488	15.3226	42	50	33	25	33	42	00:03:37	39	2311	10.1255	31	38	44	44	38.5	1899.5	12.1611
5	0	26	1	172	88	29.7458	15	37	277.5	00:02:44	71	1281	33.2553	58	92	83	67	67	58	00:03:21	52	2047	15.2418	50	56	50	50	61.5	1664	22.1755
6	0	28	1	164	68	25.2826	14	33	231	00:03:20	46	1769	15.602	67	75	33	42	42	17	00:03:55	58	2662	13.0729	62	50	56	62	52	2215.5	14.0826
7	0	18	1	165	65	23.8751	11	37	203.5	00:02:26	62	1027	36.222	50	50	67	67	58	83	00:03:10	52	1940	16.0825	50	56	50	50	57	1483.5	23.0536
8	0	21	1	163	54	20.3244	13	33	214.5	00:02:45	71	1296	32.8704	67	83	75	75	58	67	00:03:31	44	2215	11.9187	31	38	56	50	57.5	1755.5	19.6525
9	0	21	1	166	59	21.4109	15	30.5	228.75	00:03:25	71	1843	23.1145	58	83	58	67	83	75	00:03:41	61	2407	15.2057	69	69	56	50	66	2125	18.6353
10	0	24	1	170	70	24.2215	13.5	34	229.5	00:03:20	68	1777	22.96	67	75	75	75	58	58	00:03:42	59	2428	14.5799	62	56	62	56	63.5	2102.5	18.1213
11	1	25	1	186	102	29.4832	15	44	330	00:02:57	46	1458	18.93	33	50	50	67	58	17	00:03:15	64	1988	19.3159	81	69	69	38	55	1723	19.1526
12	1	27	1	170	62	21.4533	15	37	277.5	00:02:44	56	1267	26.5193	50	67	42	42	67	67	00:03:26	61	2218	16.5014	50	50	69	75	58.5	1742.5	20.1435
13	1	23	1	178	73	23.04	18	37	333	00:03:13	71	1674	25.448	50	67	67	75	83	83	00:03:33	56	2330	14.4206	56	56	50	62	63.5	2002	19.031
14	1	22	1	175	70	22.8571	14	38	266	00:03:10	67	1634	24.6022	75	83	75	50	58	58	00:03:52	41	2301	10.691	38	25	56	44	54	1967.5	16.4676
15	1	18	1	187	91	26.023	16	39.5	316	00:02:36	67	1158	34.715	58	75	58	58	83	67	00:03:14	59	1930	18.342	56	56	75	50	63	1544	24.4819
16	1	27	1	179	70	21.847	13.5	35.5	239.625	00:03:21	51	1749	17.4957	50	25	33	67	83	50	00:04:03	52	2686	11.6158	38	69	56	44	51.5	2217.5	13.9346
17	1	29	1	182	83	25.0574	17	37	314.5	00:02:54	76	1416	32.2034	83	67	75	83	75	75	00:03:20	47	2020	13.9604	25	50	56	56	61.5	1718	21.4785
18	1	25	1	191	78	21.381	17	37.5	318.75	00:03:06	89	1575	33.9048	92	100	92	83	92	75	00:03:36	58	2297	15.1502	38	62	69	62	73.5	1936	22.7789
19	1	27	1	180	83	25.6173	15.5	37.5	290.625	00:03:30	64	1914	20.0627	75	42	42	83	58	83	00:03:22	73	2147	20.4006	56	81	81	75	68.5	2030.5	20.2413
20	1	20	1	175	82.5	26.9388	13	37	240.5	00:03:42	81	2076	23.4104	83	92	75	75	75	83	00:03:38	61	2289	15.9895	38	56	75	75	71	2182.5	19.5189
21	0	38	2	169	73	25.5593	15	32.5	243.75	00:03:34	35	1964	10.6925	25	42	33	50	33	25	00:05:25	30	3183	5.65504	44	25	31	19	32.5	2573.5	7.57723
22	0	37	2	160	55	21.4844	14	34	238	00:03:15	60	1703	21.1392	67	33	67	75	67	50	00:04:16	52	2635	11.8406	50	62	56	38	56	2169	15.491
23	0	33	2	164	52	19.3337	12.5	30.5	190.625	00:03:04	65	1559	25.016	50	58	58	83	75	67	00:03:34	67	2299	17.4859	75	56	69	69	66	1929	20.5288
24	0	31	2	169	69	24.1588	17	33	280.5	00:02:44	64	1259	30.5004	67	42	75	75	67	58	00:03:25	42	2175	11.5862	31	50	38	50	53	1717	18.5207
25	0	31	2	160	57	22.2656	16	33.5	268	00:03:05	40	1574	15.2478	50	42	42	33	42	33	00:03:43	39	2336	10.0171	44	31	50	31	39.5	1955	12.1228
26	0	38	2	165	90	33.0579	14	37	259	00:03:09	62	1621	22.9488	75	67	58	75	50	50	00:03:38	41	2295	10.719	38	44	44	38	51.5	1958	15.7814
27	0	39	2	176	71.3	23.0178	14	34	238	00:03:04	49	1558	18.8703	25	50	50	67	42	58	00:03:36	36	2300	9.3913	25	44	44	31	42.5	1929	13.2193
28	0	36	2	173	74	24.7252	14	35	245	00:02:23	54	972	33.3333	17	67	42	67	83	50	00:03:17	48	2081	13.8395	31	56	69	38	51	1526.5	20.0459
29	0	39	2	171	66.5	22.742	16.5	31	255.75	00:02:35	64	1151	33.3623	67	67	58	67	50	75	00:03:24	30	2149	8.37599	31	12	31	44	47	1650	17.0909
30	0	40	2	170	90	31.1419	15	41	307.5	00:03:31	38	1923	11.8565	42	33	42	42	33	33	00:03:57	55	2593	12.7266	59	69	56	33	46.5	2258	12.3561
31	1	37	2	183	90	26.8745	15	41	307.5	00:02:49	75	1345	33.4572	50	83	83	83	75	75	00:03:18	53	2056	15.4669	50	44	56	62	64	1700.5	22.5816
32	1	40	2	170	80	27.6817	14	37.5	262.5	00:02:51	54	1375	23.5636	58	75	58	33	67	33	00:04:11	53	2624	12.1189	69	44	50	50	53.5	1999.5	16.054
33	1	36	2	190	99	27.4238	17	37.5	318.75	00:03:13	76	1683	27.0945	83	75	75	67	75	83	00:04:05	61	2794	13.0995	50	56	62	75	68.5	2238.5	18.3605
34	1	39	2	168	105	37.2024	15	44	330	00:02:50	71	1352	31.5089	75	75	58	75	75	67	00:03:37	52	2383	13.0927	38	69	62	38	61.5	1867.5	19.759
35	1	33	2	175	83	27.102	12	35	210	00:02:37	61	1178	31.0696	92	75	50	42	58	50	00:03:45	64	2512	15.2866	69	62	50	75	62.5	1845	20.3252
36	1	38	2	187	87	24.8792	16	38	304	00:02:45	65	1294	30.1391	50	67	83	67	67	58	00:04:00	53	2561	12.417	31	56	69	56	59	1927.5	18.3658
37	1	32	2	190	95	26.3158	15	41	307.5	00:02:50	47	1363	20.6897	50	58	33	25	58	58	00:03:31	34	2180	9.3578	38	31	25	44	40.5	1771.5	13.7172
38	1	37	2	177	88	28.089	16	42	336	00:03:19	62	1762	21.1124	42	67	67	67	50	83	00:03:49	52	2575	12.1165	69	56	44	38	57	2168.5	15.7713
39	1	38	2	173	84.7	28.3003	15.5	39	302.25	00:02:52	47	1382	20.4052	50	50	42	50	42	50	00:03:56	45	2689	10.0409	31	50	56	44	46	2035.5	13.5593
40	1	34	2	184	74	21.8573	13.5	37	249.75	00:03:12	61	1658	22.0748	42	58	58	67	58	83	00:03:19	22	2086	6.3279	12	31	19	25	41.5	1872	13.3013
41	0	48	3	167	79	28.3266	13	35.5	230.75	00:03:17	47	1733	16.2724	25	33	67	58	42	58	00:03:29	34	2269	8.99074	19	50	31	38	40.5	2001	12.1439
42	0	41	3	166	100	36.2897	13.5	39	263.25	00:02:48	47	1327	21.2509	42	67	67	25	42	42	00:03:02	36	1778	12.1485	25	38	38	44	41.5	1552.5	16.0386
43	0	50	3	163	78	29.3575	13	34.5	224.25	00:03:00	62	1493	24.9163	58	67	67	67	50	67	00:03:41	52	2359	13.2259	56	44	50	56	57	1926	17.757
44	0	43	3	170	74	25.6055	17	36	306	00:03:43	74	2021	21.9693	58	83	92	67	75	67	00:05:13	41	3160	7.78481	19	50	44	50	57.5	2590.5	13.3179
45	0	45	3	165	60	22.0386	10.5	31.5	165.375	00:03:09	42	1629	15.4696	33	33	33	50	58	42	00:03:51	30	2601	6.92042	31	25	38	25	36	2115	10.2128
46	0	46	3	157	55	22.3133	14	32	224	00:03:27	61	1878	19.4888	67	42	67	75	58	58	00:03:47	52	2494	12.51	44	50	50	62	56.5	2186	15.5078
47	0	48	3	166	71	25.7657	12	34	204	00:02:58	56	1459	23.0295	50	33	67	58	58	67	00:03:20	30	2126	8.4666	38	19	38	25	43	1792.5	14.3933
48	0	46	3	166	72	26.1286	13	35.5	230.75	00:02:50	29	1360	12.7941	25	25	42	25	33	25	00:03:21	31	2027	9.17612	31	38	31	25	30	1693.5	10.6289
49	0	45	3	167	92	32.9879	11	37.5	206.25	00:02:27	58	1044	33.3333	25	58	67	67	58	75	00:03:28	50	2216	13.5379	38	44	50	69	54	1630	19.8773
50	0	50	3	175	77	25.1429	12.5	35.5	221.875	00:02:56	51	1446	21.1618	33	33	58	58	42	83	00:03:19	62	2055	18.1022	50	75	75	50	56.5	1750.5	19.3659
51	1	48	3	182	118	35.6237	16	47	376	00:02:53	54	1397	23.1926	33	58	50	67	58	58	00:03:26	64	2150	17.8605	38	62	69	88	59	1773.5	19.9605
52	1	44	3	180	80	24.6914	13.5	38.5	259.875	00:02:53	64	1400	27.4286	58	42	67	75	67	75	00:03:37	62	2195	16.9476	62	56	75	56	63	1797.5	21.0292
53	1	43	3	182	104	31.3972	18	41	369	00:02:39	43	1172	22.0137	33	75	50	33	17	50	00:03:40	67	2273	17.6859	50	81	62	75	55	1722.5	19.1582
54	1	43	3	176	94	30.3461	15	42	315	00:02:52	62	1347	27.6169	67	75	50	67	67	50	00:03:24	56	2154	15.5989	62	38	62	62	59	1750.5	20.2228
55	1	48	3	181	125	38.1551	14	47	329	00:03:20	68	1772	23.0248	58	83	67	67	67	67	00:03:41	31	2383	7.80529	44	25	25	31	49.5	2077.5	14.296
56	1	44	3	169	76.1	26.6447	15	40	300	00:02:59	67	1478	27.1989	50	67	58	75	75	75	00:03:42	20	2357	5.09122	19	19	19	25	43.5	1917.5	13.6115
57	1	46	3	177	80	25.5354	12.5	39	243.75	00:03:54	51	2250	13.6	42	42	75	50	58	42	00:04:29	42	3118	8.0821	50	31	31	56	46.5	2684	10.3949
58	1	44	3	178	89	28.0899	13	41.5	269.75	00:03:21	56	1795	18.7187	58	58	50	83	50	33	00:03:51	59	2529	13.9976	44	56	69	69	57.5	2162	15.9574
59	1	44	3	172	67.5	22.8164	15	38	285	00:03:04	64	1555	24.6945	58	50	75	83	58	58	00:03:50	45	2456	10.9935	25	56	44	56	54.5	2005.5	16.3052
60	1	45	3	172	60	20.2812	13	35.5	230.75	00:03:11	85	1650	30.9091	67	83	83	92	92	92	00:03:44	62	2412	15.4229	56	56	69	69	73.5	2031	21.7134
61	0	54	4	168	96	34.0136	14.5	37.5	271.875	00:03:08	50	1612	18.6104	42	42	50	67	33	67	00:03:26	45	2127	12.6939	31	44	50	56	47.5	1869.5	15.2447
62	0	52	4	152	76.9	33.2843	13	37	240.5	00:03:06	25	1580	9.49367	25	25	25	8	42	25	00:02:09	11	939	7.02875	12	12	12	6	18	1259.5	8.57483
63	0	55	4	160	50	19.5312	17	30	255	00:03:04	60	1549	23.2408	42	75	75	58	50	58	00:03:31	28	2269	7.40414	38	12	19	44	44	1909	13.8292
64	0	58	4	155	55	22.8928	15	36	270	00:03:37	71	2011	21.1835	58	83	83	83	50	67	00:04:08	38	2613	8.7256	25	31	50	44	54.5	2312	14.1436
65	0	57	4	155	55	22.8928	17	35	297.5	00:03:23	35	1824	11.5132	33	33	25	50	42	25	00:04:40	27	3194	5.07201	12	19	44	31	31	2509	7.41331
66	0	57	4	164	63	23.4236	9.5	36	171	00:03:50	58	2197	15.8398	67	50	67	42	67	58	00:03:29	23	2228	6.1939	19	31	19	25	40.5	2212.5	10.9831
67	0	57	4	165	90	33.0579	16	40	320	00:02:31	39	1099	21.2921	50	50	42	33	33	25	00:02:09	9	944	5.72034	12	12	12	0	24	1021.5	14.0969
68	0	56	4	157	85	34.4842	14	36	252	00:02:41	29	1228	14.1694	42	17	25	33	25	33	00:03:44	45	2465	10.9533	44	44	56	38	37	1846.5	12.0227
69	0	57	4	165	65	23.8751	14	35	245	00:03:05	61	1568	23.3418	58	75	33	50	58	92	00:03:39	45	2422	11.1478	38	38	44	62	53	1995	15.9398
70	0	57	4	165	110	40.404	14.5	39.5	286.375	00:04:22	42	2561	9.83991	42	42	50	42	50	25	00:03:53	75	2597	17.3277	75	88	62	75	58.5	2579	13.6099
71	1	55	4	183	117	34.9368	14	46	322	00:02:45	60	1291	27.8854	50	58	50	83	50	67	00:03:19	34	2020	10.099	44	31	25	38	47	1655.5	17.0341
72	1	54	4	178	90	28.4055	14.5	43.5	315.375	00:02:53	74	1402	31.669	67	75	75	83	58	83	00:03:20	64	1981	19.3841	62	69	69	56	69	1691.5	24.4753
73	1	56	4	180	108	33.3333	9.5	43	204.25	00:03:32	65	1903	20.494	50	67	67	58	75	75	00:03:33	36	2191	9.85851	38	31	44	31	50.5	2047	14.8021
74	1	55	4	178	76	23.9869	16	38	304	00:02:30	50	1068	28.0899	42	25	58	58	50	67	00:03:26	61	2185	16.7506	69	38	62	75	55.5	1626.5	20.4734
75	1	51	4	195	120	31.5582	14.5	45	326.25	00:02:37	42	1165	21.6309	33	42	42	50	50	33	00:03:12	30	1907	9.43891	44	19	38	19	36	1536	14.0625
76	1	54	4	177	82.5	26.3334	12.5	41.5	259.375	00:02:40	82	1226	40.1305	75	83	83	92	75	83	00:03:24	52	2145	14.5455	50	44	69	44	67	1685.5	23.8505
77	1	59	4	175	78	25.4694	15	37.5	281.25	00:03:04	47	1550	18.1935	42	50	50	42	58	42	00:03:11	19	1916	5.9499	6	19	25	25	33	1733	11.4253
78	1	54	4	187	112	32.0284	16	44	352	00:03:24	26	1825	8.54795	8	58	42	33	8	8	00:03:40	39	2340	10	50	44	38	25	32.5	2082.5	9.36375
79	1	57	4	172	71	23.9995	15	39	292.5	00:03:29	69	1904	21.7437	50	83	75	67	83	58	00:04:04	58	2587	13.4519	62	62	62	44	63.5	2245.5	16.9673
80	1	53	4	190	102	28.2548	15.5	44	341	00:02:43	56	1255	26.7729	50	42	58	58	50	75	00:03:42	55	2432	13.5691	56	69	62	31	55.5	1843.5	18.0635
81	0	61	5	161	73	28.1625	13.5	34	229.5	00:02:51	53	1374	23.1441	50	58	42	58	42	67	00:03:12	28	1969	8.53225	25	25	25	38	40.5	1671.5	14.5378
82	0	65	5	167	80	28.6851	15.5	37	286.75	00:02:42	50	1248	24.0385	50	58	58	42	42	50	00:03:16	34	1908	10.6918	50	31	25	31	42	1578	15.9696
83	0	69	5	165	63	23.1405	10	36.5	182.5	00:03:10	24	1642	8.76979	17	17	33	42	25	8	00:03:24	28	2089	8.04213	31	31	25	25	26	1865.5	8.36237
84	0	65	5	166	57	20.6852	14	33.5	234.5	00:03:20	64	1769	21.7072	42	58	83	50	75	75	00:04:07	48	2823	10.2019	56	50	44	44	56	2296	14.6341
85	0	61	5	163	78	29.3575	13	34	221	00:03:34	68	1974	20.6687	67	58	75	75	67	67	00:03:58	38	2598	8.77598	50	38	38	25	53	2286	13.9108
86	0	61	5	172	76	25.6896	13	36	234	00:03:47	67	2155	18.6543	67	75	75	75	58	50	00:04:02	58	2700	12.8889	50	50	62	69	62.5	2427.5	15.448
87	0	61	5	174	61	20.148	14	34.5	241.5	00:03:50	54	2194	14.7675	67	42	58	58	42	58	00:04:45	48	3127	9.21011	38	56	50	50	51	2660.5	11.5016
88	0	65	5	160	54	21.0937	10.5	33	173.25	00:04:09	49	2459	11.9561	42	50	58	42	67	33	00:03:45	27	2479	6.53489	38	25	38	6	38	2469	9.23451
89	0	70	5	165	64	23.5078	10	35	175	00:03:24	50	1832	16.3755	67	50	58	33	42	50	00:03:33	23	2217	6.22463	12	31	25	25	36.5	2024.5	10.8175
90	0	61	5	155	65	27.0552	11.5	34.5	198.375	00:02:32	46	1109	24.8873	67	25	33	42	58	50	00:03:25	17	2116	4.82042	0	12	12	44	31.5	1612.5	11.7209
91	1	62	5	170	70	24.2215	12.5	37.5	234.375	00:03:39	58	2043	17.0338	50	50	67	58	58	67	00:04:13	48	2796	10.3004	31	44	62	56	53	2419.5	13.1432
92	1	69	5	173	75	25.0593	13	42	273	00:03:09	50	1624	18.4729	25	50	33	58	83	50	00:03:47	25	2477	6.05571	19	44	25	12	37.5	2050.5	10.9729
93	1	63	5	174	73	24.1115	14	40	280	00:03:11	64	1592	24.1206	75	75	58	58	58	58	00:03:07	17	1782	5.72391	25	25	6	12	40.5	1687	14.4043
94	1	70	5	168	65	23.03	9.5	37.5	178.125	00:04:21	54	2623	12.3523	67	67	58	58	33	42	00:04:30	66	3170	12.4921	50	69	75	69	60	2896.5	12.4288
95	1	63	5	178	105	33.1398	15	43	322.5	00:02:47	39	1320	17.7273	25	25	75	50	33	25	00:03:05	22	1885	7.00265	25	19	19	25	30.5	1602.5	11.4197
96	1	62	5	178	83	26.1962	11	40.5	222.75	00:03:31	36	1897	11.3864	17	42	25	33	42	58	00:03:32	23	2241	6.15797	12	31	25	25	29.5	2069	8.55486
97	1	64	5	176	76	24.5351	11	38.5	211.75	00:02:56	46	1447	19.0739	42	58	42	42	33	58	00:03:44	44	2466	10.7056	25	56	38	56	45	1956.5	13.8002
98	1	61	5	183.5	93	27.6192	13.5	41.5	280.125	00:02:38	47	1183	23.8377	58	50	33	42	58	42	00:03:06	36	1903	11.3505	56	19	38	31	41.5	1543	16.1374
99	1	63	5	180	92	28.3951	11	40.5	222.75	00:03:54	64	2170	17.6959	50	50	67	67	75	75	00:04:49	52	3160	9.87342	31	75	50	50	58	2665	13.0582
100	1	63	5	178	82	25.8806	10	39	195	00:03:08	60	1604	22.4439	33	67	58	58	75	67	00:03:37	38	2391	9.53576	44	44	38	25	49	1997.5	14.7184

## Sheet: labels
Participant	Participant number
gender	Gender	0=female, 1=male
Age	Age
AgeBracketDec	Age Brackets in decenia	1=18-30, 2=31-40, 3=41-50, 4=51-60, 5=61-70
Height	Height (cm)
Weight	Weight (Kg)
BMI	Body mass index (Weight (kg) / Height (m)**2)
NeckHeight	Height neck, occipital base to C7
NeckCirc	Neck circumference at midway point
NSA	Neck surface area (0.5 * neck height * neck circumference)
LocDuration	iTAD localisation duration (min)
LocAS	iTAD localisation accuracy score (%)
LocRT	iTAD localisation average response time (ms)
LocRCS	iTAD localisation Rate Correct Score (# correct per minute)
LocBlock1	iTAD localisation accuracy score block 1
LocBlock2	iTAD localisation accuracy score block 2
LocBlock3	iTAD localisation accuracy score block 3
LocBlock4	iTAD localisation accuracy score block 4
LocBlock5	iTAD localisation accuracy score block 5
LocBlock6	iTAD localisation accuracy score block 6
OriDuration	iTAD orientation duration (min)
OriAS	iTAD orientation accuracy score (%)
OriRT	iTAD orientation average response time (ms)
OriRCS	iTAD orientation Rate Correct Score (# correct per minute)
OriBlock1	iTAD orientation accuracy score block 1
OriBlock2	iTAD orientation accuracy score block 2
OriBlock3	iTAD orientation accuracy score block 3
OriBlock4	iTAD orientation accuracy score block 4
OverallAS	iTAD overall score accuracy score (%)
OverallRT	iTAD overall score response time (ms)
OverallRCS	iTAD overall score Rate Correct Score (# correct per minute)
