# Supplementary material for: Modernising tactile acuity assessment; clinimetrics of semi-automated tests and effects of age, sex and anthropometry on performance
Source: PeerJ. 2021 Oct 25;9:e12192. doi: 10.7717/peerj.12192 (PMC8759376; doi:10.7717/peerj.12192)
Supplement: Supplemental Information 10 [file peerj-09-12192-s010.xlsx]

## Sheet: Blad1
	number of tests/raters	number participants	BMS (between people mean square/ MS between)	OMS (observer mean square/MS within people between items)	EMS (error mean square/ MS residual within people)	ICC Absolute Agreement			Variance between people	Variance between tests/obsevers	Variance due to error	ICC Absolute Agreement	ICC Consistency		SD test 1	SD test 2	Pooled SD (if group sizes are equal)	Pooled SD (as the denominator of the ICC_C formula, for SEM_C2_1)
Loc accuracy score	3	40	485.616	295.725	69.81	0.647492			138.602	5.64788	69.81	0.647492	0.665038				0	14.4365
Loc response time	3	40	175575	73214.8	10460.3	0.82064			55038.3	1568.86	10460.3	0.82064	0.840297				0	255.927
Loc RCS (correct per min)	3	40	166.664	33.276	25.006	0.651912			47.2193	0.20675	25.006	0.651912	0.653778				0	8.49855
Ori accuracy score	3	40	355.846	43.108	34.433	0.755621			107.138	0.216875	34.433	0.755621	0.756779				0	11.8983
Ori response time	3	40	237995	72117.3	16562.8	0.804367			73810.6	1388.86	16562.8	0.804367	0.816729				0	300.622
Ori RCS (correct per min)	3	40	33.254	0.945	3.498	0.742813			9.91867	-0.063825	3.498	0.742813	0.73928				0	3.66288
Overall accuracy score	3	40	325.196	102.377	31.76	0.744738			97.812	1.76542	31.76	0.744738	0.754885				0	11.383
Overall response time	3	40	182119	71455.2	7984.35	0.858449			58045	1586.77	7984.35	0.858449	0.879079				0	256.962
Overall RCS (correct per min)	3	40	48.438	2.45	5.565	0.722566			14.291	-0.077875	5.565	0.722566	0.719732				0	4.45601
TPDT	3	40	1145.69	216.976	143.927	0.696141			333.921	1.82623	143.927	0.696141	0.698802				0	21.8597
	SEM_C1	SEM_C2_1 (using denominator of ICC_C)	SEM_C2_2 (using pooled SD)	SEM_C3_1 (using SQRT(2) * SEM_C (or SQRT(EMS)) as a replacement for SD change)	SEM_C3_2 (using SD of difference from discriptives)	SEM_AA	SEM_AA_2 (using pooled SD and ICC_AA). Not a correct formula (de Vet 2006)		95%CI true score	SDC_AA	SDC_C	SDC_B&A_2	SD of difference in score (same as SD from discriptive of difference between tests)		Mean score	Coefficient of variance
Loc accuracy score	8.35524	8.35524	0	8.35524	0	8.68665	0		17.0258	24.0782	23.1595	0			60.95	14.2521
Loc response time	102.276	102.276	0	102.276	0	109.678	0		214.968	304.011	283.494	0			1238.53	8.85551
Loc RCS (correct per min)	5.0006	5.0006	0	5.0006	0	5.02123	0		9.84161	13.9181	13.861	0			30.4636	16.4827
Ori accuracy score	5.86796	5.86796	0	5.86796	0	5.88641	0		11.5374	16.3163	16.2652	0			46.242	12.7296
Ori response time	128.697	128.697	0	128.697	0	133.984	0		262.609	371.385	356.729	0			1995.38	6.71473
Ori RCS (correct per min)	1.87029	1.87029	0	1.87029	0	1.85315	0		3.63218	5.13668	5.18419	0			14.031	13.2076
Overall accuracy score	5.6356	5.6356	0	5.6356	0	5.79011	0		11.3486	16.0494	15.6211	0			53.596	10.8033
Overall response time	89.3552	89.3552	0	89.3552	0	97.8321	0		191.751	271.177	247.68	0			1616.95	6.05041
Overall RCS (correct per min)	2.35903	2.35903	0	2.35903	0	2.34246	0		4.59122	6.49297	6.53888	0			20.1617	11.6184
TPDT	11.997	11.997	0	11.997	0	12.0728	0		23.6627	33.4642	33.2539	0			47.691	25.3147
Three ways of obtaining SEM's from: de Vet, When to use agreement versus reliability measures, p. 1037
Calculating SDC_AA and SDC_C from: de Vet, When to use agreement versus reliability measures, p. 1038
using SQRT(2) * SEM_C (or SQRT(EMS)) as a replacement for SD difference: Terwee, Quality criteria were proposed for measurement properties of health status questionnaires, p.37 & Atkinson 1998, Statistical Methods For Assessing Measurement Error (Reliability) in Variables Relevant to Sports Medicine, p, 234
Getting ICC from ANOVA table: Streiner, Health measurement scales, p. 176 & de Vet, measurement in medicine, chapter 5_5_Calculation of ICC in SPSS & McGrawWong_1996_Forming Inferences About Some Intraclass Correlation Coefficients p. 34-36
Since B&A LOA are 1.96 * SD diff and SD diff = SQRT(2) * SEM_C; SDC_C are the same as the B&A LOA (because SDC_C = 1,96 * SQRT(2) * SEM_C (= SQRT(EMS))
	SEM_AA		SDC_AA_95	SDC_AA_90	SDC_AA_85	SDC_AA_80	SDC_AA_75		95% CI true score	90% CI true score	85% CI true score	80% CI true score	75% CI true score
Loc accuracy score	8.68665		24.0782	20.2085	17.6778	15.7245	14.1152		17.0258	14.2895	12.5001	11.1189	9.98096
Loc response time	109.678		304.011	255.152	223.2	198.538	178.219		214.968	180.42	157.826	140.387	126.02
Loc RCS (correct per min)	5.02123		13.9181	11.6813	10.2185	9.0894	8.15915		9.84161	8.25992	7.22555	6.42717	5.76939
Ori accuracy score	5.88641		16.3163	13.694	11.9792	10.6555	9.56502		11.5374	9.68315	8.47055	7.53461	6.76349
Ori response time	133.984		371.385	311.698	272.665	242.537	217.715		262.609	220.404	192.803	171.5	153.948
Ori RCS (correct per min)	1.85315		5.13668	4.31114	3.77126	3.35456	3.01125		3.63218	3.04844	2.66669	2.37204	2.12927
Overall accuracy score	5.79011		16.0494	13.47	11.7832	10.4812	9.40854		11.3486	9.52474	8.33197	7.41135	6.65284
Overall response time	97.8321		271.177	227.595	199.094	177.095	158.97		191.751	160.934	140.78	125.225	112.409
Overall RCS (correct per min)	2.34246		6.49297	5.44946	4.76703	4.24031	3.80634		4.59122	3.85335	3.3708	2.99835	2.69149
TPDT	12.0728		33.4642	28.086	24.5689	21.8542	19.6175		23.6627	19.8598	17.3728	15.4532	13.8717
	http://www.tribology-abc.com/calculators/t1_2b.htm
